# Supplementary material
Source: PubMed Central journal article supplement (PMC1142393)
Supplement: pnas_0503022102_2.pdf [file pnas_0503022102_2.pdf]

**Table 4. Comparison of  $\lambda_{\max}$  values (in nanometers) for met and liganded states of *Caulobacter crescentus* and *Bradyrhizobium japonicum* FixL-PAS**

|                        | <b><i>C. crescentus</i></b><br><b><u>FixL-PAS</u></b> | <b><i>B. japonicum</i></b><br><b><u>FixL-PAS</u></b> |
|------------------------|-------------------------------------------------------|------------------------------------------------------|
| <b>met (no ligand)</b> |                                                       |                                                      |
| <i>soret</i>           | 396                                                   | 395                                                  |
| <b>imidazolylmet</b>   |                                                       |                                                      |
| <i>soret</i>           | 416                                                   | 416                                                  |
| $\alpha / \beta$       | 565 / 535                                             | 566 / 535                                            |
| <b>oxy</b>             |                                                       |                                                      |
| <i>soret</i>           | 417                                                   | 419                                                  |
| $\alpha / \beta$       | 578 / 543                                             | 578 / 544                                            |
| <b>carbonmonoxy</b>    |                                                       |                                                      |
| <i>soret</i>           | 425                                                   | 426                                                  |
| $\alpha / \beta$       | 572 / 541                                             | 575 / 544                                            |

---

Met refers to the heme in its ferric state ( $\text{Fe}^{3+}$ ). Molecular oxygen and carbon monoxide bind to heme in its ferrous state ( $\text{Fe}^{2+}$ ). The  $\lambda_{\max}$  values measured here for *C. crescentus* FixL-PAS are nearly identical to previously published values for rhizobial FixL-PAS (references in text).
