# Supplementary material
Source: PubMed Central journal article supplement (PMC1142393)
Supplement: pnas_0503022102_3.pdf [file pnas_0503022102_3.pdf]

**Table 5. Genes regulated by the FixL, FixJ, FixK, FtrA, and FtrB under hypoxia**

| Gene number/annotation                                             | $\bar{X}$ change in transcript levels<br>(wild-type/mutant) |               |               |               |               |
|--------------------------------------------------------------------|-------------------------------------------------------------|---------------|---------------|---------------|---------------|
|                                                                    | $\Delta fixL$                                               | $\Delta fixJ$ | $\Delta fixK$ | $\Delta ftrA$ | $\Delta ftrB$ |
| <b><i>Energy Production and Conversion</i></b>                     |                                                             |               |               |               |               |
| CC1405 ferredoxin, putative                                        | 50.96                                                       | 16.07         |               | 1.11          | 0.92          |
| CC0762 cytochrome d ubiquinol oxidase subunit I CydA               | 11.66                                                       | 8.22          | 24.93         | 1.40          | 1.21          |
| CC0763 cytochrome d ubiquinol oxidase subunit II CydB              | 8.12                                                        | 4.09          | 3.16          | 0.95          | 0.97          |
| CC1402 cytochrome c oxidase, subunit CcoO                          | 12.32                                                       | 3.90          | 7.31          | 1.34          | 1.16          |
| CC1401 cytochrome c oxidase, subunit CcoN                          | 6.06                                                        | 2.86          | 4.76          | 0.97          | 0.97          |
| CC1403 cytochrome c oxidase, subunit CcoQ                          | 4.53                                                        | 1.03          | 1.33          | 0.95          | 1.01          |
| CC1404 cytochrome c oxidase, subunit CcoP                          | 4.56                                                        | 1.88          | 2.21          | 1.16          | 1.14          |
| CC1363 proton pump, putative                                       | 4.46                                                        | 1.00          | 2.28          | 0.88          | 0.90          |
| CC1408 cytochrome oxidase maturation protein, cbb3-type            | 3.72                                                        | 1.40          | 2.51          | 0.97          | 0.99          |
| CC2970 cytochrome c family protein                                 | 3.12                                                        | 1.51          | 0.80          | 1.11          | 1.00          |
| CC1406 ferredoxin, putative                                        | 2.05                                                        | 1.12          | 2.46          | 1.01          | 0.93          |
| CC1773 ubiquinol oxidase subunit II QoxA                           | 0.09                                                        | 0.19          | 0.15          | 1.44          | 0.81          |
| CC1771 ubiquinol oxidase subunit III QoxC                          | 0.18                                                        | 0.56          | 0.32          | 0.98          | 0.99          |
| CC1769 SurF1 family protein                                        | 0.29                                                        | 0.67          | 0.47          | 0.99          | 1.00          |
| CC1770 ubiquinol oxidase subunit IV QoxD                           | 0.32                                                        | 0.64          | 0.37          | 0.99          | 0.90          |
| CC3403 cytochrome c oxidase assembly protein                       | 0.91                                                        | 0.85          | 0.54          | 1.04          | 1.01          |
| CC3407 cytochrome c oxidase, subunit II CoxB                       | 0.79                                                        | 1.04          | 0.58          | 1.06          | 0.97          |
| CC3406 cytochrome c oxidase, subunit I CoxA                        | 0.73                                                        | 1.00          | 0.61          | 1.19          | 1.11          |
| <b><i>Coenzyme Metabolism</i></b>                                  |                                                             |               |               |               |               |
| CC1411 coproporphyrinogen III oxidase HemN                         | 20.12                                                       | 4.31          |               | 1.08          | 0.71          |
| CC1355 5-aminolevulinic acid synthase HemaA                        | 3.36                                                        | 3.58          | 0.70          | 0.95          | 0.93          |
| CC2760 cytochrome c-type biogenesis protein CycK                   | 2.22                                                        | 1.27          | 1.03          | 1.40          | 0.99          |
| CC3763 uroporphyrinogen decarboxylase HemE                         | 1.98                                                        | 1.33          | 0.85          | 1.22          | 0.98          |
| CC2759 cytochrome c-type biogenesis protein CycL                   | 1.92                                                        | 1.26          | 0.87          | 0.77          | 0.93          |
| CC1347 delta-aminolevulinic acid dehydratase HemB                  | 1.75                                                        | 1.08          | 0.93          | 0.88          | 0.95          |
| CC2029 thiamine biosynthesis protein ThiC                          | 0.59                                                        | 0.80          | 1.02          | 0.31          | 0.53          |
| <b><i>Signal Transduction</i></b>                                  |                                                             |               |               |               |               |
| CC0759 sensory box histidine kinase FixL                           | 3.01                                                        | 2.34          | 1.38          | 0.89          | 1.08          |
| CC0758 DNA-binding response regulator FixJ                         | 1.56                                                        | 2.68          | 1.49          | 1.07          | 1.09          |
| CC0629 sensor histidine kinase, putative                           | 2.28                                                        | 1.27          | 1.50          | 0.83          | 0.83          |
| CC3058 response regulator/sensor histidine kinase                  | 1.86                                                        | 1.58          | 1.55          | 0.95          | 0.94          |
| CC0753 regulatory protein FixT                                     | 26.56                                                       | 11.82         | 5.46          | 1.22          | 1.10          |
| CC1768 sensor histidine kinase                                     | 0.33                                                        | 0.66          | 0.61          | 0.92          | 0.94          |
| CC1767 response regulator                                          | 0.35                                                        | 0.38          | 0.65          | 0.97          | 0.92          |
| <b><i>Carbohydrate and Amino Acid Transport and Metabolism</i></b> |                                                             |               |               |               |               |
| CC1409 outer membrane protein OmpW                                 | 29.14                                                       | 4.20          | 17.88         | 1.07          | 1.06          |
| CC1407 cation-transporting ATPase, E1-E2 family                    | 8.02                                                        |               |               | 1.04          | 0.97          |
| CC0761 ABC transporter, ATP-binding protein CydD                   | 2.51                                                        | 1.33          | 1.27          | 0.95          | 1.15          |
| CC0760 ABC transporter, ATP-binding protein CydC                   | 2.27                                                        | 1.53          | 1.76          | 1.39          | 1.06          |
| CC3069 major facilitator family transporter                        | 2.38                                                        | 2.11          | 1.38          | 0.90          | 1.01          |

$\bar{X}$  change in transcript levels  
(wild-type/mutant)

| Gene number/annotation                                     | $\Delta fixL$ | $\Delta fixJ$ | $\Delta fixK$ | $\Delta ftrA$ | $\Delta ftrB$ |
|------------------------------------------------------------|---------------|---------------|---------------|---------------|---------------|
| CC1446 TRAP dicarboxylate transporter, DctP subunit family | 2.35          | 1.39          |               |               |               |
| CC1298 myo-inositol degradation, iolC protein              | 0.91          | 1.17          | 1.81          | 1.99          | 0.99          |
| CC1302 methylmalonate-semialdehyde dehydrogenase, putative | 0.91          | 1.19          | 1.09          | 1.99          | 1.12          |
| CC1314 ABC transporter, HlyB/MsbA family                   | 0.97          | 1.24          | 1.06          | 1.89          | 1.23          |
| CC3262 bacterioferritin bfr                                | 1.22          | 0.93          | 0.99          | 1.75          | 1.12          |
| CC0584 succinylornithine transaminase                      | 1.15          | 1.18          | 0.73          | 1.75          | 1.74          |
| CC1300 myo-inositol degradation, IolE protein              | 0.93          | 1.22          | 1.38          | 1.75          | 1.07          |
| CC2534 histidinol-phosphate aminotransferase               | 1.40          | 0.66          |               | 1.73          | 1.60          |
| CC1296 myo-inositol 2-dehydrogenase IdhA                   | 1.04          | 1.20          | 1.11          | 1.67          | 1.13          |
| CC2999 citrate lyase, beta subunit, putative               | 0.47          | 0.61          | 0.59          | 0.95          | 1.00          |
| CC1760 acyl-CoA thioesterase I TesA                        | 0.59          | 0.52          | 0.48          | 1.06          | 0.97          |
| CC1785 efflux system protein                               | 0.61          | 0.43          | 0.34          | 1.21          | 1.04          |
| <b>Transcription</b>                                       |               |               |               |               |               |
| CC3367 transcriptional regulator, FtrA                     | 3.71          | 2.28          | 3.46          | 3.61          | 0.88          |
| CC0752 transcriptional regulator, FixK                     | 2.73          | 1.89          | 2.65          | 1.62          | 1.30          |
| CC1410 transcriptional activator, FtrB                     | 6.16          | 3.81          | 6.59          | 1.05          | 9.12          |
| CC2883 RNA polymerase sigma-70 factor, ECF subfamily sigU  | 1.21          | 0.58          | 1.22          | 0.54          | 1.03          |
| <b>Replication, Recombination and Repair</b>               |               |               |               |               |               |
| CC0377 A/G-specific adenine glycosylase MutY               | 1.89          | 1.52          | 1.09          | 0.90          | 1.04          |
| CC0008 chromosomal replication initiator protein DnaA      | 1.18          | 0.99          | 1.02          | 1.66          | 1.05          |
| <b>General Function Prediction Only</b>                    |               |               |               |               |               |
| CC0212 hydrolase, carbon-nitrogen family                   | 2.12          | 2.61          | 1.24          | 1.04          | 0.96          |
| CC1456 flagellin modification protein FlmH                 | 4.42          | 1.93          | 3.48          | 1.27          | 1.05          |
| CC0257 adenosylhomocysteinase achY                         | 1.44          | 1.84          | 1.43          | 1.11          | 0.91          |
| CC0811 metallo-beta-lactamase family protein               | 2.57          | 1.33          | 1.42          | 0.99          | 0.91          |
| CC1716 ISCc2, transposase                                  | 2.11          | 1.08          | 1.36          | 0.89          | 0.99          |
| CC0200 oxidoreductase iron/ascorbate family                | 2.06          | 1.17          | 1.89          | 1.37          | 1.16          |
| CC1348 monooxygenase, flavin-binding family                | 1.99          | 1.08          | 1.32          | 1.45          | 1.06          |
| CC2948 pilus subunit protein PilA                          | 1.01          | 0.82          | 1.18          | 1.74          | 1.10          |
| CC2538 membrane protein, putative                          | 0.41          | 0.43          | 1.10          | 0.90          | 0.99          |
| CC0714 membrane protein, putative                          | 0.43          | 0.63          | 0.95          | 1.14          | 1.06          |
| CC1761 IS30 family, transposase                            | 0.50          | 0.47          | 0.30          | 1.28          | 0.92          |
| CC3733 carbohydrate kinase, PfkB family                    | 0.50          | 0.96          | 0.86          | 0.89          | 0.90          |
| CC0335 TonB-dependent receptor                             | 0.56          | 0.96          | 0.95          | 0.90          | 0.96          |
| <b>Posttranslational Modification / Protein Turnover</b>   |               |               |               |               |               |
| CC0685 chaperonin, 60 kDa groEL                            |               | 0.77          | 0.99          | 2.13          | 1.41          |
| CC0686 chaperonin, 10 kDa groES                            | 1.06          | 0.90          | 1.00          | 2.03          | 1.22          |
| CC2258 heat shock protein, Hsp20 family                    | 1.26          | 0.74          | 0.85          | 1.73          | 1.11          |
| <b>Hypothetical Proteins</b>                               |               |               |               |               |               |
| CC1400 hypothetical protein                                | 6.74          | 4.47          | 6.14          | 1.06          | 1.16          |
| CC2193 hypothetical protein                                | 1.08          | 3.56          | 0.87          | 1.05          | 0.77          |
| CC0277 hypothetical protein                                | 6.35          | 2.74          | 6.28          | 1.00          | 0.98          |
| CC0027 conserved hypothetical protein                      | 3.27          | 2.21          | 1.92          | 0.65          | 0.80          |

$\bar{X}$  change in transcript levels  
(wild-type/mutant)

| Gene number/annotation                | $\Delta fixL$ | $\Delta fixJ$ | $\Delta fixK$ | $\Delta fixA$ | $\Delta fixB$ |
|---------------------------------------|---------------|---------------|---------------|---------------|---------------|
| CC0845 hypothetical protein           | 2.43          | 1.92          | 0.85          | 1.26          | 0.96          |
| CC2115 hypothetical protein           | 4.60          | 1.89          | 9.06          | 0.87          | 0.87          |
| CC1453 hypothetical protein           | 6.57          | 1.88          | 3.27          | 1.01          | 1.12          |
| CC2910 conserved hypothetical protein | 2.56          | 1.82          | 1.82          | 1.04          | 1.24          |
| CC0135 conserved hypothetical protein | 1.72          | 1.78          | 1.27          | 0.90          | 1.04          |
| CC1452 conserved hypothetical protein | 13.20         |               |               | 1.26          | 1.03          |
| CC2518 hypothetical protein           | 7.77          | 1.60          | 2.42          | 1.01          | 0.99          |
| CC2831 hypothetical protein           | 3.38          | 1.49          | 1.28          | 1.13          | 1.04          |
| CC1391 hypothetical protein           | 2.94          | 1.54          | 1.71          | 0.92          | 1.00          |
| CC1067 hypothetical protein           | 2.33          | 1.63          | 1.46          | 1.06          | 1.18          |
| CC0387 hypothetical protein           | 2.12          | 1.04          | 1.36          | 0.83          | 0.93          |
| CC3115 conserved hypothetical protein | 1.99          | 1.35          | 0.77          | 0.78          | 0.81          |
| CC1450 conserved hypothetical protein | 1.95          | 1.30          | 1.16          | 1.27          | 1.18          |
| CC0209 conserved hypothetical protein | 1.81          | 1.47          | 1.38          | 0.92          | 0.94          |
| CC0730 hypothetical protein           | 1.74          | 1.40          | 0.84          | 1.37          | 1.16          |
| CC0135 conserved hypothetical protein | 1.72          | 1.78          | 1.27          | 0.90          | 1.04          |
| CC1662 conserved hypothetical protein | 0.95          | 0.98          | 1.74          | 1.01          | 1.00          |
| CC0876 hypothetical protein           | 1.00          | 0.90          | 1.12          | 1.81          | 1.11          |
| CC2074 hypothetical protein           | 0.99          | 0.84          | 0.95          | 1.75          | 1.02          |
| CC2998 hypothetical protein           | 1.33          | 0.78          | 0.86          | 1.75          | 1.02          |
| CC1784 conserved hypothetical protein | 0.27          | 0.41          | 0.31          | 1.37          |               |
| CC1782 hypothetical protein           | 0.32          | 0.56          | 0.45          | 1.02          | 0.84          |
| CC1758 conserved hypothetical protein | 0.40          | 0.51          | 0.32          | 1.09          | 0.93          |
| CC1500 conserved hypothetical protein | 0.45          | 0.62          | 0.88          | 1.19          | 1.05          |
| CC2778 hypothetical protein           | 0.53          | 0.86          | 0.82          | 1.13          | 1.03          |
| CC1783 hypothetical protein           | 0.54          | 0.69          | 0.51          | 1.19          | 0.98          |
| CC1234 hypothetical protein           | 1.04          | 0.70          | 0.50          | 0.75          | 0.91          |
| CC0559 hypothetical protein           | 0.88          | 1.10          | 0.57          | 1.01          | 1.09          |
| CC2229 conserved hypothetical protein | 0.74          | 0.92          | 0.60          | 1.19          | 1.02          |
| CC0681 hypothetical protein           | 1.05          | 1.78          | 0.61          | 0.65          | 1.00          |
| CC0682 hypothetical protein           | 0.93          | 1.46          | 0.61          | 0.73          | 1.14          |
| CC3263 conserved hypothetical protein | 0.76          | 1.52          | 1.07          | 0.54          | 0.95          |
| CC0421 conserved hypothetical protein | 1.00          | 0.99          |               | 0.56          | 0.97          |
| CC0669 hypothetical protein           | 0.66          | 0.47          | 0.75          | 1.09          | 0.53          |
| CC2435 hypothetical protein           | 0.66          | 0.62          | 0.95          | 0.82          | 0.91          |
| CC3220 hypothetical protein           | 0.64          | 0.67          | 0.95          | 0.98          | 0.86          |
| CC3061 hypothetical protein           | 0.86          | 1.45          | 0.86          | 0.78          | 0.80          |
| CC3060 conserved hypothetical protein | 0.95          | 1.66          | 0.97          | 0.63          | 0.85          |
| CC1325 hypothetical protein           | 0.64          | 0.67          | 1.01          | 0.96          | 0.96          |
| CC3073 hypothetical protein           | 0.52          | 0.49          | 0.96          | 0.93          | 0.93          |

Values shown are averaged from four independent gene chip experiments. All genes that exhibit 1.6-fold change or greater in at least one of the mutant strains, and that meet a

statistical cutoff parameter (computed in SIGNIFICANCE ANALYSIS OF MICROARRAYS software package version 1.21) are shown. See *Materials and Methods* for a reference on our microarray methods. Genes are arranged by functional category based on their COG description. Blank values indicate missing data.
