# Supplementary material
Source: PubMed Central journal article supplement (PMC1142393)

**A**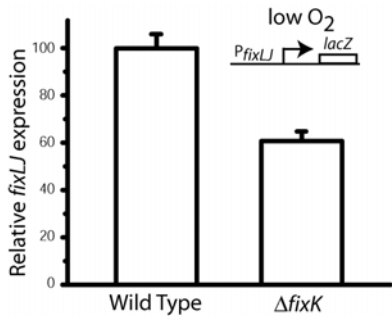**B**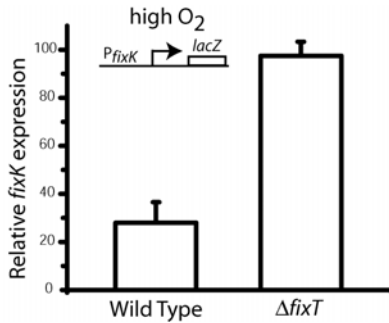

Supplement: pnas_0503022102_5.pdf [file pnas_0503022102_5.pdf]
